# Supplementary material for: Effects of Lysozyme, Proteinase K, and Cephalosporins on Biofilm Formation by Clinical Isolates of Pseudomonas aeruginosa
Source: Hindawi journal article supplement (doi:10.1155/2020/6156720), 2020-02-08
Supplement: f1 [file 6156720.f1.pdf]

*P. aeruginosa* clinical isolates obtained from private clinics and different Mansoura hospitals

| No | Isolate code | Quantitative assay by tissue culture plate method according to biofilm intensity | Geographical source | Source |
|----|--------------|----------------------------------------------------------------------------------|---------------------|--------|
| 1  | U1           | Strongly adherent                                                                | MUH                 | Urine  |
| 2  | U2           | Moderately adherent                                                              | MUH                 | Urine  |
| 3  | U3           | Strongly adherent                                                                | UNC                 | Urine  |
| 4  | U4           | Weakly adherent                                                                  | UNC                 | Urine  |
| 5  | U5           | Strongly adherent                                                                | UNC                 | Urine  |
| 6  | U6           | Strongly adherent                                                                | Private clinic      | Urine  |
| 7  | U7           | Strongly adherent                                                                | MUH                 | Urine  |
| 8  | U8           | Strongly adherent                                                                | MUH                 | Urine  |
| 9  | U9           | Strongly adherent                                                                | MUH                 | Urine  |
| 10 | U10          | Weakly adherent                                                                  | UNC                 | Urine  |
| 11 | U11          | Moderately adherent                                                              | UNC                 | Urine  |
| 12 | U12          | Strongly adherent                                                                | UNC                 | Urine  |
| 13 | U13          | Moderately adherent                                                              | UNC                 | Urine  |
| 14 | U14          | Moderately adherent                                                              | UNC                 | Urine  |
| 15 | U15          | Moderately adherent                                                              | MUH                 | Urine  |
| 16 | U16          | Strongly adherent                                                                | MUH                 | Urine  |
| 17 | U17          | Strongly adherent                                                                | MUH                 | Urine  |
| 18 | U18          | Strongly adherent                                                                | MUH                 | Urine  |
| 19 | U19          | Strongly adherent                                                                | MUH                 | Urine  |
| 20 | U20          | Moderately adherent                                                              | UNC                 | Urine  |
| 21 | U21          | Strongly adherent                                                                | UNC                 | Urine  |
| 22 | U22          | Strongly adherent                                                                | UNC                 | Urine  |
| 23 | U23          | Strongly adherent                                                                | UNC                 | Urine  |
| 24 | U24          | Strongly adherent                                                                | UNC                 | Urine  |
| 25 | U25          | Strongly adherent                                                                | UNC                 | Urine  |
| 26 | U26          | Strongly adherent                                                                | UNC                 | Urine  |
| 27 | U27          | Strongly adherent                                                                | UNC                 | Urine  |
| 28 | U28          | Strongly adherent                                                                | UNC                 | Urine  |
| 29 | U29          | Strongly adherent                                                                | UNC                 | Urine  |
| 30 | U30          | Strongly adherent                                                                | UNC                 | Urine  |
| 31 | U31          | Moderately adherent                                                              | UNC                 | Urine  |
| 32 | U32          | Strongly adherent                                                                | UNC                 | Urine  |
| 33 | U33          | Strongly adherent                                                                | UNC                 | Urine  |
| 34 | U34          | Moderately adherent                                                              | UNC                 | Urine  |

|    |     |                     |                |        |
|----|-----|---------------------|----------------|--------|
| 35 | U35 | Strongly adherent   | UNC            | Urine  |
| 36 | U36 | Strongly adherent   | UNC            | Urine  |
| 37 | W1  | Moderately adherent | MIH            | Wound  |
| 38 | W2  | Moderately adherent | BCC            | Wound  |
| 39 | W3  | Moderately adherent | MIH            | Wound  |
| 40 | W4  | Moderately adherent | BCC            | Wound  |
| 41 | W5  | Moderately adherent | MUH            | Wound  |
| 42 | W6  | Weakly adherent     | MUH            | Wound  |
| 43 | W7  | Moderately adherent | MIH            | Wound  |
| 44 | W8  | Strongly adherent   | MUH            | Wound  |
| 45 | W9  | Moderately adherent | MUH            | Wound  |
| 46 | W10 | Strongly adherent   | MUH            | Wound  |
| 47 | W11 | Strongly adherent   | IC unit        | Wound  |
| 48 | W12 | Strongly adherent   | IC unit        | Wound  |
| 49 | W13 | Moderately adherent | IC unit        | Wound  |
| 50 | W14 | Strongly adherent   | IC unit        | Wound  |
| 51 | W15 | Moderately adherent | IC unit        | Wound  |
| 52 | W16 | Moderately adherent | IC unit        | Wound  |
| 53 | S1  | Strongly adherent   | MIH            | Sputum |
| 54 | S2  | Strongly adherent   | MUH            | Sputum |
| 55 | S3  | Strongly adherent   | CH             | Sputum |
| 56 | S4  | Strongly adherent   | MIH            | Sputum |
| 57 | S5  | Strongly adherent   | CH             | Sputum |
| 58 | S6  | Strongly adherent   | MUH            | Sputum |
| 59 | S7  | Weakly adherent     | CH             | Sputum |
| 60 | S8  | Strongly adherent   | MUH            | Sputum |
| 61 | S9  | Strongly adherent   | CH             | Sputum |
| 62 | S10 | Strongly adherent   | CH             | Sputum |
| 63 | S11 | Moderately adherent | Private clinic | Sputum |
| 64 | S12 | Moderately adherent | Private clinic | Sputum |
| 65 | S13 | Strongly adherent   | Private clinic | Sputum |
| 66 | E1  | Moderately adherent | OC             | Eye    |
| 67 | E2  | Strongly adherent   | OC             | Eye    |
| 68 | E3  | Strongly adherent   | OC             | Eye    |
| 69 | E4  | Strongly adherent   | OC             | Eye    |
| 70 | E5  | Moderately adherent | OC             | Eye    |
| 71 | E6  | Strongly adherent   | OC             | Eye    |
| 72 | E7  | Strongly adherent   | OC             | Eye    |
| 73 | E8  | Strongly adherent   | OC             | Eye    |
| 74 | E9  | Moderately adherent | OC             | Eye    |

|       |         |                                                                                             |                |                  |
|-------|---------|---------------------------------------------------------------------------------------------|----------------|------------------|
| 75    | E10     | Moderately adherent                                                                         | OC             | Eye              |
| 76    | E11     | Moderately adherent                                                                         | OC             | Eye              |
| 77    | E12     | Weakly adherent                                                                             | OC             | Eye              |
| 78    | E13     | Moderately adherent                                                                         | OC             | Eye              |
| 79    | B1      | Strongly adherent                                                                           | BCC            | Burn             |
| 80    | B2      | Strongly adherent                                                                           | BCC            | Burn             |
| 81    | B3      | Strongly adherent                                                                           | BCC            | Burn             |
| 82    | B4      | Moderately adherent                                                                         | BCC            | Burn             |
| 83    | B5      | Strongly adherent                                                                           | BCC            | Burn             |
| 84    | B6      | Weakly adherent                                                                             | BCC            | Burn             |
| 85    | B7      | Strongly adherent                                                                           | BCC            | Burn             |
| 86    | B8      | Strongly adherent                                                                           | BCC            | Burn             |
| 87    | B9      | Strongly adherent                                                                           | BCC            | Burn             |
| 88    | B10     | Moderately adherent                                                                         | BCC            | Burn             |
| 89    | Uc1     | Strongly adherent                                                                           | UNC            | Urinary catheter |
| 90    | Uc2     | Strongly adherent                                                                           | UNC            | Urinary catheter |
| 91    | Uc3     | Moderately adherent                                                                         | UNC            | Urinary catheter |
| 92    | Uc4     | Strongly adherent                                                                           | UNC            | Urinary catheter |
| 93    | Uc5     | Strongly adherent                                                                           | UNC            | Urinary catheter |
| 94    | Uc6     | Weakly adherent                                                                             | UNC            | Urinary catheter |
| 95    | Uc7     | Moderately adherent                                                                         | UNC            | Urinary catheter |
| 96    | Uc8     | Moderately adherent                                                                         | UNC            | Urinary catheter |
| 97    | Uc9     | Moderately adherent                                                                         | UNC            | Urinary catheter |
| 98    | Cl1     | Strongly adherent                                                                           | Private clinic | Contact lens     |
| 99    | Cl2     | Weakly adherent                                                                             | Private clinic | Contact lens     |
| 100   | Cl3     | Strongly adherent                                                                           | Private clinic | Contact lens     |
| 101   | Cl4     | Strongly adherent                                                                           | Private clinic | Contact lens     |
| 102   | Bl1     | Moderately adherent                                                                         | GSC            | Blood            |
| 103   | Bl2     | Moderately adherent                                                                         | GSC            | Blood            |
| Total | 103 (%) | Strongly adherent: 61 (59.2%)<br>Moderately adherent: 34 (33%)<br>Weakly adherent: 8 (7.7%) |                |                  |

- MUH: Mansoura University Hospital, BCC: Burns and Cosmetics Center, MIH: Mansoura International Hospital, UNC: Urology and Nephrology Center, CH: Chest Hospital, IC unit: Infection control unit, GSC: Gastroenterology surgical center
- U: urine, W: wound, S: sputum, E: eye, B: burn, Uc: urinary catheter, Cl: contact lens, Bl: blood
